# Supplementary material for: Identification and quantification of gaseous organic compounds emitted from biomass burning using two-dimensional gas chromatography–time-of-flight mass spectrometry
Source: Copernicus journal article supplement (doi:10.5194/acp-15-1865-2015), 2015-02-23
Supplement: Supplementary file 1 [file Table_S1.xlsx]

## Sheet: Table S1
Compound	Formula	Primary RT (s)	Secondary RT (s)	Emission Factors (g/kg)
				Black Spruce	Pond. Pine	G. Cutgrass	Wiregrass	Rice Straw	Ind. Peat
Burn and Fuel Characteristics
Burn Number				156	144	148	151	153	154
MCE				0.933	0.927	0.925	0.97	0.942	0.832
Carbon (wt %)				50.5	51.11	44.84	46.7	42.07	54.7
Hydrogen (wt %)				6.37	6.64	6.1	6.32	5.68	N/A
Nitrogen (wt %)				0.66	1.09	2.03	0.61	1.3	N/A
Sulfur (wt %)				0.054	N/A	0.207	N/A	0.212	0.119
Ash (wt %)				3.8	1.5	2.3	N/A	7.7	3.8
Aromatic Hydrocarbons
0 D.B.E. (of substituents)
Benzene	C6H6	454.861	1.672	0.554266	0.705489	0.269521	0.0307454	0.14282	0.877459
Toluene	C7H8	754.765	1.672	0.406742	0.476642	0.0983486	0.0281215	0.140666	0.902146
Ethylbenzene	C8H10	1024.68	1.628	0.0626276	0.0804266	0.0112487	0.00393299	0.0187699	0.153358
m&p-Xylene	C8H10	1064.67	1.619	0.131535	0.151602	0.0116913	0.0065758	0.0353082	0.352477
o-Xylene	C8H10	1129.64	1.72	0.0511463	0.0546279	0.00306312	-	0.0153481	0.181978
Benzene, isopropyl-	C9H12	1199.62	1.544	0.00909855	0.00838542	0.000591581	-	0.000788272	0.00494423
Benzene, propyl-	C9H12	1284.6	1.566	0.00927225	0.0118272	-	-	0.00214437	0.0441701
Benzene, 1-ethyl-(3+4)-methyl-	C9H12	1309.59	1.588	0.0335926	0.0396456	0.00192109	0.00105349	0.00900998	0.0633589
Benzene, 1,3,5-trimethyl-	C9H12	1349.57	1.602	0.00477446	0.00783447	-	-	0.00234879	0.0172502
Benzene, 1-ethyl-2-methyl-	C9H12	1364.57	1.65	0.0116062	0.0151542	0.000674107	-	0.00288381	0.0482309
Benzene, 1,2,4-trimethyl-	C9H12	1419.55	1.65	0.0120242	0.0183753	0.000835302	0.000701027	0.00589435	0.0758817
Benzene, 1,2,3-trimethyl-	C9H12	1494.53	1.76	0.0167778	0.0243419	-	-	0.00307527	0.0600614
Isobutylbenzene	C10H14	1429.55	1.487	0.00233282	-	-	-	-	0.00648717
m-Cymene	C10H14	1464.54	1.509	0.00773658	0.0122193	-	-	0.000606259	0.00614203
p-Cymene	C10H14	1474.53	1.514	0.0388978	0.0387565	-	-	0.000840376	0.0232431
o-Cymene	C10H14	1509.52	1.566	0.0013594	-	-	-	-	-
Benzene, 1,4-diethyl-	C10H14	1534.52	1.527	0.00183361	0.00265095	-	-	0.000577329	-
Benzene, 1-methyl-3-propyl-	C10H14	1544.51	1.527	0.00304497	0.00428518	-	-	0.00104218	0.0154422
Benzene, 1-methyl-4-propyl-	C10H14	1554.51	1.536	0.00238519	0.00313422	-	-	0.000672593	0.0105001
Benzene, butyl-	C10H14	1554.51	1.549	0.0065825	0.00916888	-	-	0.00118902	0.02853
Benzene, 5-ethyl-1,3-dimethyl-	C10H14	1569.5	1.558	0.00320169	0.00370122	-	-	0.00113266	0.00967142
Benzene, 1-methyl-2-propyl-	C10H14	1589.5	1.584	0.00299366	0.00456936	-	-	0.000686049	0.0207242
Benzene, 2-ethyl-1,4-dimethyl-	C10H14	1619.49	1.593	0.00220225	0.00310248	-	-	0.000792638	0.0102101
1,3-Dimethyl-4-ethylbenzene	C10H14	1629.48	1.606	0.00339623	0.00482803	-	-	0.00127353	0.0156374
Benzene, 4-ethyl-1,2-dimethyl-	C10H14	1639.48	1.619	0.00236022	0.00387386	-	-	0.0010561	0.0130559
Benzene, 2-ethyl-1,3-dimethyl-	C10H14	1659.48	1.668	-	0.00237925	-	-	-	0.00652567
1,2-Dimethyl-3-ethylbenzene	C10H14	1694.46	1.698	0.00220586	0.0028988	-	-	0.000649976	-
1,2,3,5-tetramethylbenzene	C10H14	1749.45	1.703	0.00707987	0.00760916	-	-	0.00171125	0.022188
Benzene, 1,2,3,4-tetramethyl-	C10H14	1824.42	1.786	-	-	-	-	-	0.0356414
C11H16 isomer	C11H16	1664.47	1.456	0.00444053	0.00554892	-	-	-	0.0158342
C11H16 isomer	C11H16	1684.47	1.487	-	0.00389747	-	-	-	-
C11H16 isomer	C11H16	1754.44	1.544	-	-	-	-	-	0.0116943
C11H16 isomer	C11H16	1769.44	1.54	-	-	-	-	-	0.0145417
C11H16 isomer	C11H16	1774.44	1.531	0.00355392	0.00425234	-	-	-	0.0116713
Benzene, pentyl-	C11H16	1799.43	1.531	0.0111052	0.0111003	-	-	0.00121065	0.0264609
C11H16 isomer	C11H16	1829.42	1.566	0.0049463	0.0063102	-	-	0.000374762	0.0197182
Benzene, hexyl-	C12H18	2029.36	1.518	0.00269659	0.00360905	-	-	0.000596367	0.0189243
Benzene, (1,3-dimethylbutyl)-	C12H18	2054.35	1.553	-	0.00291091	-	-	-	0.0108771
Benzene, heptyl-	C13H20	2249.29	1.509	-	-	-	-	-	0.00934246
1 D.B.E. (of substituents)
Styrene	C8H8	1119.65	2.094	0.0980052	0.135173	0.0358826	0.00631845	0.0276125	0.0843005
Benzene, 2-propenyl-	C9H10	1259.6	1.826	0.00509841	0.00639337	-	-	0.00125441	0.0115847
à-Methylstyrene	C9H10	1364.57	1.914	0.0125192	0.0162281	0.00124628	-	0.00226135	0.00654995
cis-1-Propenylbenzene	C9H10	1384.56	1.892	0.00370911	0.00497608	-	-	0.00117793	0.00819646
Benzene, 1-ethenyl-3-methyl-	C9H10	1414.55	1.954	0.0445083	0.062821	0.00604229	0.00192346	0.00993548	0.0437214
4-methyl styrene	C9H10	1424.55	1.949	0.0105966	0.0110511	0.00161517	-	0.00235794	-
Benzene, 1-propenyl, trans	C9H10	1494.53	2.02	0.00745902	0.0107485	0.0013222	-	0.00236247	0.0197574
Indane	C9H10	1509.52	1.91	0.00596364	0.0110495	0.000911724	-	0.00233806	0.0257304
o-Isopropenyltoluene	C10H12	1439.55	1.628	0.00216507	0.00385248	-	-	-	-
C10H12 isomer	C10H12	1519.52	1.769	0.00279279	0.00420102	-	-	0.000891054	0.00772669
C10H12 isomer	C10H12	1554.51	1.791	0.00282655	-	-	-	0.000645183	-
C10H12 isomer	C10H12	1609.49	1.822	0.00227813	-	-	-	0.000645755	0.00734535
C10H12 isomer	C10H12	1614.49	1.782	-	0.00397617	-	-	-	-
C10H12 isomer	C10H12	1624.49	1.822	0.00646947	0.012438	-	-	0.00118959	-
C10H12 isomer	C10H12	1634.48	1.857	0.00447382	0.00789789	-	-	-	-
C10H12 isomer	C10H12	1639.48	1.764	-	-	-	-	0.00165197	0.0107607
C10H12 isomer	C10H12	1649.48	1.826	0.0237823	0.0242967	-	-	0.0015243	0.0193279
C10H12 isomer	C10H12	1659.48	1.866	0.00236342	0.00333145	-	-	0.000730517	-
C10H12 isomer	C10H12	1679.47	1.874	-	-	-	-	0.000739835	-
C10H12 isomer	C10H12	1689.47	1.866	-	-	-	-	0.000647558	-
C10H12 isomer	C10H12	1734.45	1.901	0.00296582	0.00335516	-	-	-	-
C10H12 isomer	C10H12	1759.44	1.923	0.0032716	0.00457724	-	-	0.00135332	0.0078828
C10H12 isomer	C10H12	1779.44	1.835	0.00205819	0.00356845	-	-	0.000868727	0.0106243
C10H12 isomer	C10H12	1804.43	1.896	-	0.00391008	-	-	0.000875961	0.0139019
C10H12 isomer	C10H12	1829.42	1.98	-	0.00304436	-	-	-	0.00852193
C11H14 isomer	C11H14	1769.44	1.729	0.00428159	0.00410471	-	-	-	-
C11H14 isomer	C11H14	1909.4	1.769	-	-	-	-	-	0.0114911
C14H20 isomer	C14H20	2584.18	1.91	-	-	-	-	-	0.0182636
2 D.B.E. (of substituents)
Phenylacetylene	C8H6	1064.67	3.089	0.0266059	0.0317484	0.0262783	0.00289231	0.0054741	-
Benzene,1-ethynyl-2-methyl-	C9H8	1369.57	2.715	0.00408475	0.00501115	0.0013829	-	0.000402836	-
Indene	C9H8	1544.51	2.429	0.0524766	0.0678433	0.0304615	0.00276936	0.0143875	0.0275702
C10H10 isomer	C10H10	1634.48	2.103	0.00220102	0.00281997	-	-	0.00062539	-
C10H10 isomer	C10H10	1714.46	2.288	0.00278633	0.00341057	-	-	0.000499665	-
C10H10 isomer	C10H10	1814.43	2.248	0.0126294	0.0196609	0.00337835	0.00116123	0.00593168	0.0204577
C10H10 isomer	C10H10	1829.42	2.319	0.00868992	0.0160362	0.00203089	-	0.00485945	0.0198383
C10H10 isomer	C10H10	1839.42	2.341	0.00399001	0.00503227	0.00062119	-	0.00123503	-
C11H12 isomer	C11H12	1869.41	1.993	-	-	-	-	0.000449819	-
C11H12 isomer	C11H12	2024.36	2.178	-	-	-	-	0.000580723	-
C11H12 isomer	C11H12	2064.35	2.13	0.00170698	0.0025048	-	-	0.000915602	0.00667182
C11H12 isomer	C11H12	2079.34	2.196	0.00255158	0.00447628	-	-	0.00164447	0.0101753
C11H12 isomer	C11H12	2089.34	2.248	0.00286726	0.00502516	-	-	0.00170789	-
C11H12 Isomer	C11H12	2094.34	2.226	-	-	-	-	-	0.0101269
PAHs (and related)
Naphthalene	C10H8	1909.4	2.952	0.0831835	0.0891053	0.070168	0.00484216	0.0262196	0.0460364
Naphthalene, 2-methyl-	C11H10	2164.31	2.741	0.0137457	0.0162341	0.00551427	0.00244349	0.00692334	0.0351975
Naphthalene, 1-methyl-	C11H10	2199.3	2.847	0.0132353	0.0159575	0.00498938	-	0.00545526	0.0336139
Biphenyl	C12H10	2314.27	2.952	0.00641512	0.00594924	0.00330153	-	0.00225158	0.0210699
Naphthalene, 1-ethyl-	C12H12	2364.25	2.596	0.00557089	-	-	-	0.00147622	-
Naphthalene, 1,6-dimethyl-	C12H12	2429.23	2.662	-	-	-	-	0.00145386	-
Naphthalene, 1,3-dimethyl-	C12H12	2439.23	2.666	0.00555409	0.00650331	-	-	0.00201256	0.0468251
Acenaphthylene	C12H8	2494.21	3.744	0.0109968	0.0115267	0.017466	0.00321386	0.00359401	-
Other
4-Phenylbut-3-ene-1-yne	C10H8	1844.42	2.886	0.00335045	0.0053196	0.00114348	-	0.00125043	-
Oxygenated Aromatics
Alcohols
Phenol	C6H6O	1334.58	3.538	0.125129	0.482689	0.147617	0.0573068	0.255106	0.468999
Phenol, 2-methyl	C7H8O	1524.52	3.56	0.020824	0.0497326	0.0146399	0.0107021	0.0429722	0.0949618
Phenol, 3+4-methyl	C7H8O	1579.5	0.959	0.0185202	0.0425854	0.0103478	0.0115175	0.0271373	-
o-Guaiacol	C7H8O2	1644.48	1.065	0.0132737	0.0549216	-	0.0201258	0.0105842	0.0786168
Phenol, 2,6-dimethyl-	C8H10O	1679.47	1.584	-	-	-	-	0.00381188	-
2,5-dimethyl phenol	C8H10O	1764.44	4.704	-	0.0110119	-	-	0.00794756	-
Aldehydes
Benzaldehyde	C7H6O	1309.59	3.802	0.0595211	0.0713984	0.0341037	0.00444039	0.0201867	0.0301947
Salicyladehyde	C7H6O2	1529.52	4.343	-	0.0153902	0.00730951	-	0.00641916	-
Benzeneacetaldehyde	C8H8O	1519.52	3.85	0.00129003	0.00317305	-	-	0.000789594	-
Benzaldehyde, 2+3-methyl-	C8H8O	1604.49	3.247	0.0202516	0.0253274	0.00479589	-	0.0073144	-
Ketones
Acetophenone	C8H8O	1594.5	3.533	0.00397474	0.00669391	0.00135207	0.0005505	0.00479996	0.0113853
Acetophenone, 3'-methyl-	C9H10O	1864.41	3.115	-	-	-	-	0.00174117	-
1,2-Naphthalenedione	C10H6O2	1904.4	4.299	-	-	0.000667093	-	-	-
3,3-Dimethyl-1-indanone	C11H12O	2179.31	2.262	-	-	-	-	0.001652	-
Furans
Benzofuran	C8H6O	1419.55	2.979	0.0358558	0.0445081	0.0228716	0.00539904	0.0193483	0.047586
Benzofuran, 2,3-dihydro-	C8H8O	1624.49	2.913	-	-	-	-	0.00111778	-
Methyl benzofuran isomer	C9H8O	1684.47	2.627	0.0041157	0.00604227	0.00171508	-	0.00295779	0.0110575
Methyl benzofuran isomer	C9H8O	1704.46	2.675	0.00807063	0.0119674	0.00280838	0.00215556	0.00616261	0.0234612
Methyl benzofuran isomer	C9H8O	1714.46	2.565	0.00678526	0.0131226	0.00215447	0.00209577	0.00529135	0.0271322
Ethyl-benzofuran isomer	C10H10O	1924.39	2.504	-	-	-	-	0.00143931	-
Ethyl-benzofuran isomer	C10H10O	1939.39	2.341	-	-	-	-	0.000832204	-
Benzofuran, -dimethyl- (isomer)	C10H10O	1944.38	2.336	-	0.00397628	-	-	0.00172595	0.0132868
Benzofuran, dimethyl- (isomer)	C10H10O	1974.37	2.385	0.00323567	0.00620272	-	-	0.0030318	0.0161283
Ethyl-benzofuran isomer	C10H10O	1989.37	2.394	-	-	-	-	0.0010284	-
Benzofuran, 2-ethenyl-	C10H8O	2004.36	3.164	-	-	-	-	0.00099692	-
Ethers & Esters
Anisole	C7H8O	1189.63	2.468	0.00415377	0.00823542	0.00155478	0.000872501	0.00150077	-
4-methyl anisole	C8H10O	1474.53	2.244	0.00436732	0.0108705	-	0.00187283	0.00166074	0.0100193
Acetic acid, phenyl ester	C8H8O2	1564.51	3.252	-	-	-	-	0.000786074	-
2,3-Dimethylanisole	C9H12O	1694.46	2.011	-	-	-	-	-	0.00602096
4-ethyl anisole	C9H12O	1704.46	2.13	-	-	-	-	0.000531325	-
Benzoic acid, methyl ester	C8H8O2	1664.47	2.904	-	0.0164971	-	-	-	0.00506238
Benzene, 1-ethenyl-4-methoxy-	C9H10O	1804.43	2.706	-	-	-	-	0.000553256	-
Estragole	C10H12O	1899.4	2.341	-	0.0130283	-	-	-	-
Other
1,3-Benzodioxole	C7H6O2	1419.55	3.238	0.00367375	-	0.00206953	-	0.00126019	-
Aliphatic Hydrocarbons
0 D.B.E.
Butane, 2-methyl-	C5H12	159.955	0.898	0.00488168	-	-	-	0.00118635	0.0363953
Pentane	C5H12	174.95	0.906	0.0316446	0.0644119	-	-	0.008589	0.325097
Pentane, 2-methyl-	C6H14	249.926	0.937	0.0026909	0.00752268	-	-	0.00117896	0.0494576
Pentane, 3-methyl-	C6H14	269.92	0.95	-	0.00445232	-	-	-	0.00812004
Hexane	C6H14	299.91	0.959	0.0201363	0.0477726	-	-	0.00370872	0.196578
Pentane, 2,4-dimethyl-	C7H16	359.891	0.959	-	0.000444616	-	-	-	-
Hexane, 2-methyl-	C7H16	449.862	0.972	0.000280449	0.000708492	-	0.000145701	7.56351e-05	0.00780465
Pentane, 2,3-dimethyl-	C7H16	454.861	0.986	0.000856162	0.00168381	-	-	-	0.00753585
Hexane, 3-methyl-	C7H16	469.856	0.981	-	-	-	-	-	0.0100864
Heptane	C7H16	534.835	0.986	0.0161906	0.0322915	-	0.00142451	0.00279831	0.194063
Pentane, 2,2,4-trimethyl-	C8H18	509.843	0.968	0.00465194	-	0.0010785	0.00421051	-	-
Hexane, 2,5-dimethyl-	C8H18	624.806	0.977	-	-	-	0.000267704	-	-
Hexane, 2,3-dimethyl-	C8H18	709.779	0.994	-	-	-	-	0.000129296	-
Pentane,2,3,3-trimethyl	C8H18	714.778	0.999	0.000160688	-	-	-	-	0.00520123
Heptane, 2-methyl-	C8H18	724.774	0.986	-	-	-	-	-	0.0341503
Heptane, 3-methyl-	C8H18	744.768	0.99	-	-	-	-	-	0.00170336
Octane	C8H18	824.742	0.994	0.0095098	0.0273112	-	-	0.00147243	0.183484
Heptane, 2,6-dimethyl-	C9H20	909.715	0.981	-	0.00158875	-	-	-	0.0134666
Heptane, 2,3-dimethyl-	C9H20	989.69	0.999	-	-	-	-	-	0.00627921
Octane, 2-methyl-	C9H20	1014.68	0.99	-	-	-	-	-	0.00587658
Octane, 3-methyl-	C9H20	1034.68	0.994	-	-	-	-	-	0.00566174
Nonane	C9H20	1109.65	1.003	0.00617536	0.0193075	-	-	0.00149614	0.153788
C10H22 isomer	C10H22	1209.62	0.994	-	0.00170202	-	-	0.000346916	0.0209283
C10H22 isomer	C10H22	1229.61	1.008	-	0.00357917	-	-	-	0.0167826
C10H22 isomer	C10H22	1234.61	1.003	0.00191066	-	-	-	0.000348206	-
Nonane, 2-methyl-	C10H22	1289.59	0.99	-	0.00105603	-	-	-	0.0120991
Decane	C10H22	1384.56	1.012	0.00540733	0.0142748	-	-	0.00134211	0.135806
C10H22 isomer	C10H22	1449.54	0.994	-	0.00223404	-	-	0.000348556
C11H24 isomer	C11H24	1449.54	0.999	-	-	-	-	-	0.0312892
C11H24 isomer	C11H24	1534.52	1.008	-	-	-	-	-	0.0137375
C11H24 isomer	C11H24	1549.51	1.008	-	-	-	-	-	0.0165133
Undecane	C11H24	1634.48	1.025	0.00458888	0.0246082	-	-	0.00104173	0.105472
C12H26 isomer	C12H26	1789.43	1.021	-	-	-	-	-	0.0109839
Dodecane	C12H26	1869.41	1.038	-	0.00448586	-	-	-	0.0878037
C13H28 isomer	C13H28	1909.4	1.021	-	0.00176802	-	-	0.000379046	0.0350441
Tridecane	C13H28	2089.34	1.052	0.00279841	0.00385859	-	-	0.000837507	0.058077
Tetradecane	C14H30	2299.27	1.06	-	-	-	-	0.000452828	0.0262871
C15H32 isomer	C15H32	2259.28	1.03	-	-	-	-	-	0.0191322
C15H32 isomer	C15H32	2424.23	1.038	-	-	-	-	-	0.0163058
Pentadecane	C15H32	2489.21	1.074	-	-	-	-	-	0.00908389
1 D.B.E.
1-Butene, 3-methyl-	C5H10	149.958	0.906	0.0317215	0.0368536	0.00245575	0.00183829	0.00869806	0.0556345
1-Pentene	C5H10	169.952	0.924	0.0298375	0.0384737	-	0.00762516	0.00804331	0.10469
2-Methyl-1-butene	C5H10	174.95	0.933	-	0.041069	0.00554183	-	0.013046	0.130175
2-Pentene, (E)-	C5H10	184.947	0.937	0.0219609	0.0531082	0.00320449	0.00448307	0.0149082	0.118138
2-Pentene, (Z)-	C5H10	194.944	0.95	0.0718081	0.0764733	0.00513	0.00397133	0.0182241	0.23286
Cyclopentane	C5H10	244.928	0.977	-	0.00266369	-	0.000532522	0.000322858	0.00463418
1-Pentene, 4-methyl-	C6H12	234.931	0.959	0.0047093	0.00745693	0.000477369	0.000465812	0.0025721	0.0316417
1-Butene, 2,3-dimethyl-	C6H12	249.926	0.968	0.0144561	0.0227832	0.000763003	0.000134639	0.00607456	0.0526978
1-Hexene	C6H12	284.915	0.994	0.12175	0.164283	0.00317989	0.0053961	0.0237991	0.362562
2-Hexene, (E)-	C6H12	309.907	1.003	0.00649797	0.0122615	0.000690949	0.000869457	0.00339456	0.0587471
2-Pentene, 2-methyl-	C6H12	314.906	1.012	0.0252126	0.032522	0.000892499	0.000562685	0.0073991	0.0492347
2-Pentene, 3-methyl-, (Z)-	C6H12	324.902	1.021	-	0.012189	0.000567053	-	0.00407048	-
2-Hexene, (Z)-	C6H12	329.901	1.016	-	-	-	0.000626192	-	0.0264449
2-Pentene, 3-methyl-, (E)-	C6H12	344.896	1.025	0.00626414	0.0126338	0.0004724	0.000440775	0.00355106	0.0165419
Cyclopentane, methyl-	C6H12	359.891	1.012	0.00288179	0.00784561	-	0.00030215	0.000704913	0.023999
2-Pentene, 4-methyl-	C6H12	369.888	1.038	0.000802314	0.00122879	-	-	0.000259627	0.00712189
Cyclohexane	C6H12	434.867	1.043	-	-	0.000139036	0.000152478	-	0.00632432
1-Hexene, 3-methyl-	C7H14	414.874	1.008	-	0.00159243	-	-	0.000349932	0.00713385
1-Hexene, 5-methyl-	C7H14	429.869	1.016	-	0.00224689	-	-	0.00036732	0.00647323
1-Pentene, 2,3-dimethyl-	C7H14	434.867	1.025	-	-	-	-	0.00036979	-
1-butene, 2-ethyl, 3-methyl	C7H14	449.862	1.021	0.0035958	0.00564825	-	-	0.00211809	0.0164526
2-Hexene, 5-methyl-, (E)-	C7H14	484.851	1.03	-	-	-	-	-	0.00453547
1-Heptene	C7H14	509.843	1.034	0.0617954	0.0687685	0.0013373	0.00225337	0.013468	0.224412
3-Heptene, (E)-	C7H14	529.837	1.025	0.000586736	0.00193741	-	-	0.000141851	0.016197
(Z)-3-Methyl-2-hexene	C7H14	544.832	1.038	0.00243955	0.00255482	-	-	0.00152631	-
2-Heptene, (E)-	C7H14	554.829	1.038	0.0043359	0.0155004	-	-	-	0.0540357
3-Methyl-2-hexene (E)	C7H14	564.826	1.047	0.0010417	0.00158759	-	-	0.000728172	0.0045435
2-Heptene, Z	C7H14	574.822	1.047	0.00285819	0.00484592	-	-	0.000335591	0.0281555
C7H14 isomer	C7H14	579.821	1.052	-	-	-	-	0.000352586	-
Cyclohexane, methyl-	C7H14	599.814	1.052	-	0.00328182	-	-	-	0.01702
Cyclopentane, ethyl-	C7H14	629.805	1.052	-	0.00490862	-	-	0.000364427	0.0213787
C8H16 isomer	C8H16	634.803	1.034	-	-	-	-	-	0.0055598
3-heptene, 2-methyl-(Z)	C8H16	684.787	1.012	-	-	-	-	-	0.0051005
1-hexene, 2,5-dimethyl-	C8H16	699.782	1.025	0.00116951	0.00162741	-	-	0.000309559	0.0138057
3-Heptene, 2-methyl-, (E)-	C8H16	719.776	1.038	0.00140862	-	-	-	-	0.00391767
2-Heptene, 6-methyl- (E)	C8H16	744.768	1.043	-	-	-	-	0.000499197	0.00810288
Cyclohexane, 1,4-dimethyl-	C8H16	764.762	1.047	0.00120179	0.002478	-	-	0.000458373	0.00983603
1-Heptene, 2-methyl-	C8H16	784.755	1.052	-	0.00182618	-	-	0.000181699	0.0079243
1-Octene	C8H16	799.75	1.047	0.033428	0.0535587	0.00108971	0.00206491	0.00810928	0.187627
3-Octene, (E)-	C8H16	819.744	1.043	0.00167495	0.00197079	-	-	-	0.0102123
2-Methyl-2-heptene	C8H16	824.742	1.056	0.00162145	0.00181449	-	-	0.00043366	0.0122265
2-Octene, (E)-	C8H16	839.738	1.052	0.00344684	0.00647447	-	-	0.000468409	0.0248827
Cyclohexane, 1,3-dimethyl-, trans-	C8H16	844.736	1.065	-	-	-	-	-	0.0029948
2-Octene, (Z)-	C8H16	864.73	1.06	0.00186094	0.00315876	-	-	0.000198959	0.015852
Cyclopentane, 1-ethyl-2-methyl-, cis-	C8H16	889.722	1.069	-	-	-	-	-	0.00250375
1-Pentene, 3-ethyl-3-methyl-	C8H16	914.714	1.021	-	-	-	-	-	0.00355846
Cyclopentane, propyl-	C8H16	919.712	1.069	0.000664303	0.00215718	-	-	-	0.00902076
Cyclohexane, ethyl-	C8H16	924.71	1.082	0.000592271	0.00143171	-	-	-	0.0101116
C8H16 isomer	C8H16	1034.68	1.065	-	-	-	-	-	0.00456725
Cyclohexane, 1,1,3-trimethyl-	C9H18	944.704	1.047	-	-	-	-	-	0.0129
C9H18 isomer	C9H18	974.694	1.043	0.00122093	-	-	-	0.00116202	0.0228509
C9H18 isomer	C9H18	1009.68	1.052	0.00113764	-	-	-	-	0.0208092
4-Nonene, E	C9H18	1074.66	1.056	-	0.00191518	-	-	-	0.00961781
1-Nonene	C9H18	1089.66	1.06	0.0228943	0.0354192	0.00108045	0.000931998	0.00643973	0.143163
cis-4-Nonene	C9H18	1099.65	1.052	0.00104988	0.00245443	-	-	-	0.0146739
2-Nonene, (E)-	C9H18	1124.65	1.065	0.00173484	0.00323006	-	-	-	0.0212729
cis-2-Nonene	C9H18	1149.64	1.074	-	0.00228806	-	-	-	0.0114856
Cyclopentane, butyl-	C9H18	1209.62	1.078	0.00168309	0.00275883	-	-	-	0.0148712
C9H18 isomer	C9H18	1249.61	1.056	0.000932628	0.00135562	-	-	-	0.00866558
C9H18 isomer	C9H18	1279.6	1.074	-	-	-	-	-	0.00492081
C10H20 isomer	C10H20	1144.64	1.03	-	-	-	-	0.000309693	0.0190546
C10H20 isomer	C10H20	1269.6	1.056	-	-	-	-	-	0.0131934
C10H20 isomer	C10H20	1299.59	1.06	-	-	-	-	-	0.0119307
C10H20 isomer	C10H20	1349.57	1.065	-	0.00159144	-	-	-	0.0126975
1-Decene	C10H20	1359.57	1.074	0.0227714	0.0368617	0.00221633	-	0.00717376	0.128307
C10H20 isomer	C10H20	1394.56	1.074	0.00236605	0.00354593	-	-	0.000157588	0.0231309
C10H20 isomer	C10H20	1419.55	1.082	-	0.0022203	-	-	-	0.0197937
C10H20 isomer	C10H20	1479.53	1.109	-	0.00319166	-	-	-	0.0100641
C10H20 isomer	C10H20	1499.53	1.06	-	-	-	-	-	0.00691979
C10H20 isomer	C10H20	1589.5	1.052	-	-	-	-	-	0.00641149
C11H22 isomer	C11H22	1429.55	1.047	-	-	-	-	0.00160559	0.00641453
C11H22 Isomer	C11H22	1529.52	1.065	-	-	-	-	-	0.00787825
C11H22 isomer	C11H22	1609.49	1.074	-	0.00172857	-	-	-	0.00890138
1-Undecene	C11H22	1614.49	1.087	0.0131367	0.0286297	0.000754701	0.000743999	0.0043795	0.094432
C11H22 Isomer	C11H22	1629.48	1.082	-	-	-	-	-	0.00437773
C11H22 isomer	C11H22	1644.48	1.091	0.0018252	0.00481038	-	-	-	0.0159984
C11H22 isomer	C11H22	1669.47	1.1	-	0.00220067	-	-	-	0.00805304
C11H22 isomer	C11H22	1739.45	1.113	-	0.00185259	-	-	-	-
C12H24 isomer	C12H24	1844.42	1.087	-	-	-	-	-	0.0120338
1-Dodecene	C12H24	1854.41	1.096	0.012633	0.0136102	-	-	0.00429685	0.0980512
C12H24 isomer	C12H24	1879.4	1.1	-	0.00331875	-	-	-	0.020502
C12H24 isomer	C12H24	1884.4	1.109	-	-	-	-	-	0.0129853
C12H24 isomer	C12H24	1904.4	1.109	-	-	-	-	-	0.0167694
C12H24 isomer	C12H24	1919.39	1.074	-	-	-	-	-	0.0111244
C12H24 isomer	C12H24	1974.37	1.135	-	-	-	-	-	0.0100364
C13H26 isomer	C13H26	2069.34	1.096	-	-	-	-	-	0.0145545
1-Tridecene	C13H26	2074.34	1.104	0.00674995	0.00885797	-	-	0.00278495	0.053008
C13H26 isomer	C13H26	2099.33	1.109	-	-	-	-	-	0.0114621
C13H26 isomer	C13H26	2124.33	1.122	-	-	-	-	-	0.00959236
C13H26 isomer	C13H26	2209.3	1.069	-	-	-	-	0.00162665	-
C14H28 isomer	C14H28	2109.33	1.082	-	-	-	-	-	0.0194464
1-Tetradecene	C14H28	2284.28	1.118	0.00539057	-	-	-	0.00242005	0.0393195
1-pentadecene	C15H30	2479.21	1.126	-	-	-	-	-	0.0155169
2 D.B.E.
1-Butyne, 3-methyl-	C5H8	159.955	0.999	0.000848122	-	-	-	3.94126e-05	-
1,4-Pentadiene	C5H8	164.954	0.946	0.0222137	0.0602954	0.00100383	0.00103429	0.00359103	0.0124495
1-Pentyne	C5H8	194.944	1.091	-	-	-	-	0.000200474	-
1,3-Pentadiene, (E)	C5H8	204.941	1.021	0.0605264	0.0728616	0.0064153	0.00532799	0.0209602	0.0902723
1,3-Pentadiene, (Z)-	C5H8	214.938	1.038	0.0350755	0.0493247	0.00324931	0.00263144	0.015676	0.0493296
Cyclopentene	C5H8	234.931	1.021	0.0346637	0.0556137	0.00167112	0.00276389	0.00719835	0.0770641
2-Pentyne	C5H8	264.922	1.17	0.00180166	0.00208365	0.000309528	-	0.000814787	-
1,4-Pentadiene, 3-methyl-	C6H10	224.934	0.994	0.00200329	0.00260662	-	-	0.000507631	-
1,4-Pentadiene, 2-methyl-	C6H10	259.923	1.03	0.00528424	0.00788009	-	-	0.00155798	0.0065688
1,5-Hexadiene	C6H10	269.92	1.038	0.010126	0.0138752	-	-	0.00181649	0.014504
1,4-Hexadiene, (E)-	C6H10	299.91	1.069	0.00525963	0.00793402	-	-	0.0009679	0.00715497
1,4-Hexadiene, (Z)-	C6H10	314.906	1.082	0.0042139	0.00394992	-	-	-	-
1,3-Pentadiene, 2-methyl-, (Z)-	C6H10	324.902	1.109	0.0308341	0.0545821	0.00252237	-	0.00956721	-
Cyclopentene, 3-methyl-	C6H10	329.901	1.056	0.0077216	0.00656468	-	0.0012739	0.00312202	0.0311233
3-Hexyne	C6H10	334.899	1.1	-	-	-	-	-	0.00830647
1,3-Butadiene, 2,3-dimethyl-	C6H10	349.894	1.122	0.00678125	0.00503815	0.000467384	-	0.0024929	0.00523975
1,3-Hexadiene,c&t	C6H10	359.891	1.131	0.0129763	0.0192795	0.000695884	0.0010608	0.00344371	0.0304457
1,3-Pentadiene, 2-methyl-, (E)-	C6H10	389.882	1.153	0.0116186	0.0194491	0.000909003	0.000878666	0.00489536	0.0345548
4-Methyl-1,3-pentadiene	C6H10	399.878	1.175	0.0121874	0.019874	0.000688269	-	0.00392826	0.038773
Cyclopentene, 1-methyl-	C6H10	414.874	1.104	0.0230821	0.0420803	0.00141032	0.00223169	0.00882823	0.0756678
1,3-Pentadiene, 3-methyl-, (Z)-	C6H10	424.87	1.184	0.00864501	0.0191525	0.000701663	-	0.00378462	0.0142653
2,4-Hexadiene, (E,E)-	C6H10	439.866	1.17	0.00401656	0.00704917	-	-	0.00190589	0.0146627
2,4-Hexadiene, (E,Z)-	C6H10	464.858	1.197	0.00652826	0.0107513	-	-	0.00253673	0.0207036
Cyclohexene	C6H10	484.851	1.157	0.0257346	0.0414714	0.00116813	0.00143125	0.00380614	0.0632932
C7H12 isomer	C7H12	394.88	1.069	-	0.00208376	-	-	-	-
C7H12 isomer	C7H12	449.862	1.056	0.00217009	0.00241109	-	-	0.000681767	0.00668341
C7H12 isomer	C7H12	469.856	1.113	0.00193716	-	-	-	-	-
C7H12 isomer	C7H12	479.853	1.113	-	-	-	-	0.000875233	-
1,6-Heptadiene	C7H12	489.85	1.104	0.0095871	0.0143004	-	-	0.000481289	0.00806674
C7H12 isomer	C7H12	509.843	1.122	0.00211332	0.00405025	-	-	0.000493131	-
C7H12 isomer	C7H12	524.838	1.109	0.00362892	0.00498259	-	-	0.0011212	0.00810591
3,5-Dimethylcyclopentene	C7H12	539.834	1.082	0.00382857	0.00613102	-	-	0.00197518	0.0164873
C7H12 isomer	C7H12	539.834	1.126	-	0.00970788	-	-	0.000476861	-
C7H12 isomer	C7H12	574.822	1.1	0.005111	0.00928128	-	-	0.00194036	0.0179699
C7H12 isomer	C7H12	589.818	1.122	0.00490033	0.00722036	-	-	0.000927576	0.00835066
Cyclopentene, 3-ethyl-	C7H12	599.814	1.113	0.00164647	0.00462902	-	-	0.000684163	0.00972162
Vinylcyclopentane	C7H12	604.813	1.131	0.00569965	0.00762526	-	-	0.000582964	0.00692355
C7H12 isomer	C7H12	609.811	1.162	0.00194249	0.00450218	-	-	0.000663979	0.0100504
C7H12 isomer	C7H12	634.803	1.175	0.00192504	0.00343628	-	-	0.000987973	-
Cyclohexene, 3-methyl-	C7H12	649.798	1.148	0.00724759	0.0134544	-	-	0.00247942	0.0165647
Cyclohexene, 4-methyl-	C7H12	654.797	1.157	0.00381979	0.00540472	-	-	-	0.00799999
C7H12 isomer	C7H12	659.795	1.188	-	0.00274812	-	-	0.000458021	-
C7H12 isomer	C7H12	664.794	1.206	-	0.0190257	-	-	-	-
Cyclopentene, 4,4-dimethyl-	C7H12	689.786	1.131	0.00626352	0.0176844	-	0.000885091	0.00168597	0.0371913
Cyclopentene, 3-ethyl-	C7H12	694.784	1.135	-	-	-	-	0.000905245	-
C7H12 isomer	C7H12	704.781	1.197	0.00344526	0.00630484	-	-	0.00139179	0.0183086
C7H12 isomer	C7H12	724.774	1.21	0.0028202	0.00527819	-	-	0.000707116	0.0121116
Cyclohexene, 1-methyl-	C7H12	739.77	1.179	0.0057037	0.0108434	-	-	0.00158532	0.0302006
C7H12 isomer	C7H12	744.768	1.232	-	0.00259205	-	-	0.00093729	0.00689506
C7H12 isomer	C7H12	744.768	1.245	0.00328471	0.00326897	-	-	-	-
Cyclopentane, ethylidene-	C7H12	754.765	1.179	-	-	-	-	0.000389925	0.00598313
C7H12 isomer	C7H12	779.757	1.232	0.00328157	0.00345288	-	-	-	0.00686371
C7H12 isomer	C7H12	779.757	1.236	-	0.00298117	-	-	0.000736444	-
C8H14 isomer	C8H14	689.786	1.082	-	-	-	-	-	0.003944
C8H14 isomer	C8H14	754.765	1.109	-	-	-	-	-	0.00427685
1,7-Octadiene	C8H14	774.758	1.131	0.00633159	0.0116049	-	-	0.000796357	0.00947854
C8H14 isomer	C8H14	789.754	1.126	-	0.00359117	-	-	0.000422104	0.0034448
C8H14 isomer	C8H14	814.746	1.135	-	0.00202698	-	-	-	-
C8H14 isomer	C8H14	824.742	1.135	0.00165517	-	-	-	0.000731162	-
C8H14 isomer	C8H14	834.739	1.144	0.00145305	0.00376396	-	-	-	0.00351996
1-Ethyl-5-methylcyclopentene	C8H14	849.734	1.109	0.00134721	0.00227125	-	-	0.000346128	0.00580221
C8H14 isomer	C8H14	879.725	1.135	-	0.00175102	-	-	0.00041245	-
Cyclopentene, 3-propyl-	C8H14	884.723	1.131	0.00232814	0.00171166	-	-	-	0.00842724
C8H14 isomer	C8H14	894.72	1.153	0.00520296	0.0230849	-	-	0.000768859	0.0110823
C8H14 isomer	C8H14	904.717	1.17	0.00262919	0.00734381	-	-	0.000871557	0.0136774
C8H14 isomer	C8H14	904.717	1.184	0.00316017	-	-	-	-	-
C8H14 isomer	C8H14	914.714	1.078	-	-	-	-	-	0.00341442
C8H14 isomer	C8H14	929.709	1.126	-	-	-	-	0.000283414	0.00522733
C8H14 isomer	C8H14	959.699	1.14	0.00126656	0.0021786	-	-	-	0.00693064
C8H14 isomer	C8H14	974.694	1.188	0.00136801	0.00248627	-	-	-	0.00544112
C8H14 isomer	C8H14	984.691	1.206	0.00191093	0.00250025	-	-	0.000337952	0.00850923
C8H14 isomer	C8H14	1004.68	1.21	0.00154192	0.00204296	-	-	-	-
C8H14 isomer	C8H14	1014.68	1.219	-	0.00183527	-	-	-	0.0047428
Cyclohexane, ethylidene-	C8H14	1024.68	1.197	-	0.00269795	-	-	-	0.00762971
C8H14 isomer	C8H14	1039.67	1.219	-	-	-	-	-	0.00377263
C8H14 isomer	C8H14	1099.65	1.153	-	0.00349743	-	-	-	-
C9H16 isomer	C9H16	999.686	1.109	0.000357974	0.00252036	-	-	-	0.0211935
C9H16 isomer	C9H16	1009.68	1.122	-	0.00127693	-	-	-	0.0144784
C9H16 isomer	C9H16	1019.68	1.122	-	-	-	-	-	0.00951857
C9H16 isomer	C9H16	1054.67	1.126	0.00216847	0.00518506	-	-	0.000310831	0.00807173
1,8-Nonadiene	C9H16	1064.67	1.144	0.00743384	0.0134769	-	-	0.000743326	-
C9H16 isomer	C9H16	1079.66	1.126	-	0.00168199	-	-	0.000519844	0.00469637
C9H16 isomer	C9H16	1089.66	1.148	-	0.00253207	-	-	-	-
C9H16 isomer	C9H16	1099.65	1.148	-	-	-	-	-	0.00480062
C9H16 isomer	C9H16	1124.65	1.157	-	0.00261523	-	-	-	0.00642617
C9H16 isomer	C9H16	1139.64	1.157	-	0.00185517	-	-	-	-
C9H16 isomer	C9H16	1144.64	1.166	0.00176862	0.00326294	-	-	0.000449039	0.0142852
C9H16 isomer	C9H16	1164.63	1.166	-	0.001962	-	-	-	-
C9H16 isomer	C9H16	1169.63	1.175	-	0.00233695	-	-	-	0.00848335
C9H16 isomer	C9H16	1189.63	1.184	-	0.00599942	-	-	0.000323724	0.00801908
C9H16 isomer	C9H16	1239.61	1.192	-	0.00625755	-	-	-	-
C9H16 isomer	C9H16	1244.61	1.153	-	-	-	-	-	0.00880184
C9H16 isomer	C9H16	1254.6	1.197	-	-	-	-	-	0.00599581
C9H16 isomer	C9H16	1274.6	1.197	-	0.00250356	-	-	-	0.00653318
C9H16 isomer	C9H16	1274.6	1.219	-	-	-	-	-	-
C10H18 isomer	C10H18	1199.62	1.109	-	0.00263732	-	-	-	-
C10H18 isomer	C10H18	1239.61	1.122	0.00132542	-	-	-	-	-
C10H18 isomer	C10H18	1299.59	1.14	0.00151095	0.00490929	-	-	-	-
C10H18 isomer	C10H18	1304.59	1.148	0.00219513	-	-	-	-	0.00814353
C10H18 isomer	C10H18	1329.58	1.144	-	0.00165979	-	-	-	0.0119914
1,9-Decadiene	C10H18	1339.58	1.153	0.00475707	0.0121349	-	-	0.00075072	0.0116433
C10H18 isomer	C10H18	1349.57	1.153	0.00239542	0.00565777	-	-	-	0.00823468
C10H18 isomer	C10H18	1364.57	1.166	0.00210201	0.00647707	-	-	0.000266518	-
C10H18 isomer	C10H18	1369.57	1.153	-	-	-	-	-	0.00480689
C10H18 isomer	C10H18	1374.57	1.166	0.00128315	0.00249086	-	-	-	0.0137983
C10H18 isomer	C10H18	1384.56	1.162	0.00310046	0.00793323	-	-	0.000251077	-
C10H18 isomer	C10H18	1394.56	1.17	0.00239639	0.00270994	-	-	-	-
C10H18 isomer	C10H18	1419.55	1.179	-	0.00268255	-	-	-	-
C10H18 isomer	C10H18	1434.55	1.175	-	0.00226556	-	-	-	-
C10H18 isomer	C10H18	1454.54	1.197	0.00221349	0.00343496	-	-	-	0.0100988
C10H18 isomer	C10H18	1459.54	1.21	0.0093351	0.0164207	-	-	0.000735321	-
C10H18 isomer	C10H18	1509.52	1.17	-	0.00206174	-	-	-	0.00539807
C10H18 isomer	C10H18	1539.51	1.21	-	-	-	-	-	0.00560469
1,10-Undecadiene	C11H20	1599.49	1.162	0.00317521	0.00620499	-	-	0.000353814	0.014258
C11H20 isomer	C11H20	1624.49	1.17	-	0.00244553	-	-	-	0.00585891
C11H20 isomer	C11H20	1639.48	1.157	0.00153129	-	-	-	-	-
C11H20 isomer	C11H20	1704.46	1.206	0.00221265	0.00299038	-	-	-	0.00710501
C11H20 isomer	C11H20	1719.46	1.197	0.00287316	0.00247039	-	-	-	-
1,11-Dodecadiene	C12H22	1834.42	1.17	0.00853184	0.0104308	-	-	-	0.014124
1,12-Tridecadiene	C13H24	2059.35	1.175	0.00288518	0.00347577	-	-	-	0.0129359
C14H26 isomer	C14H26	2234.29	1.285	-	-	-	-	-	0.0215126
3 D.B.E.
1-Buten-3-yne, 2-methyl-	C5H6	174.95	1.144	0.00218513	0.00240099	-	-	0.000196484	-
4-Penten-1-yne	C5H6	209.939	1.307	0.000919713	0.00367166	0.000295669	-	0.000358804	-
1,3-Cyclopentadiene	C5H6	219.936	1.126	0.136804	0.1799	0.0324946	0.00939307	0.0360163	0.0634692
3-Penten-1-yne, (E)-	C5H6	224.934	1.417	0.00137579	0.00344883	-	-	0.000137841	-
1-Penten-3-yne	C5H6	229.933	1.153	0.00326275	0.00344883	0.000601484	-	0.000911929	-
3-Penten-1-yne, (Z)-	C5H6	269.92	1.373	0.00742051	0.0065497	0.00137567	-	0.00286201	-
1-Hexen-3-yne	C6H8	309.907	1.219	0.00266055	0.00632202	-	-	0.00080844	-
2-Hexene-4-yne	C6H8	529.837	1.514	-	-	-	-	0.000332984	-
1,3-Cyclopentadiene, 1-methyl-	C6H8	394.88	1.267	0.0611381	0.0905512	0.00501702	0.00360705	0.0134139	0.0466902
1,3-Cyclopentadiene, 5-methyl-	C6H8	404.877	1.289	0.0541098	0.0780612	0.0042154	0.00292214	0.0113103	0.039447
1,3-Cyclohexadiene	C6H8	464.858	1.316	0.0435981	0.0688694	0.00204855	0.00217366	0.00669039	0.0224125
1,4-Cyclohexadiene	C6H8	559.827	1.39	-	0.00164231	-	-	-	-
C7H10 isomer	C7H10	554.829	1.21	0.00362844	0.00265756	-	-	-	-
C7H10 isomer	C7H10	589.818	1.25	0.00104508	0.00117365	-	-	-	-
C7H10 isomer	C7H10	604.813	1.267	0.000504995	0.00218981	-	-	0.000141554	-
C7H10 isomer	C7H10	624.806	1.276	0.00345474	0.00541922	-	-	0.000419224	0.00439869
C7H10 isomer	C7H10	669.792	1.302	0.0116582	0.0190257	-	0.00092132	0.000986042	0.0200835
C7H10 isomer	C7H10	679.789	1.324	0.00482645	0.00502134	-	-	0.000534657	0.00511907
C7H10 isomer	C7H10	689.786	1.32	0.0310375	0.0126293	-	0.000276434	0.000604759	0.0133394
C7H10 isomer	C7H10	714.778	1.342	0.026299	0.0224498	-	0.000267653	0.000704594	0.0149243
C7H10 isomer	C7H10	734.771	1.346	0.00768976	0.0176471	-	-	0.000244131	0.00742068
C7H10 isomer	C7H10	754.765	1.355	0.00571835	0.00613469	-	-	0.000722996	-
C7H10 isomer	C7H10	764.762	1.36	0.00176895	0.00587215	-	-	-	-
C7H10 isomer	C7H10	774.758	1.364	0.00733687	-	-	-	0.0012708	0.0078447
C7H10 isomer	C7H10	769.76	1.386	-	0.0147189	-	-	-	-
C7H10 isomer	C7H10	834.739	1.404	0.00259746	0.00523966	-	-	-	0.00435713
C8H12 isomer	C8H12	874.726	1.276	0.00209486	0.00579425	-	-	-	0.00373984
C8H12 isomer	C8H12	889.722	1.28	0.0016314	0.00130768	-	-	-	-
C8H12 isomer	C8H12	919.712	1.298	-	0.00144693	-	-	-	-
C8H12 isomer	C8H12	929.709	1.302	0.00122857	0.00217283	-	-	-	-
C8H12 isomer	C8H12	939.706	1.324	0.00222382	0.00386662	-	-	-	-
C8H12 isomer	C8H12	959.699	1.32	-	0.00229034	-	-	-	0.00299357
C8H12 isomer	C8H12	979.693	1.311	0.00364465	0.00129161	-	-	-	0.00808692
C8H12 isomer	C8H12	979.693	1.324	-	0.00152082	-	-	-	-
C8H12 isomer	C8H12	989.69	1.263	0.0014326	0.00179866	-	-	-	-
C8H12 isomer	C8H12	994.688	1.338	0.00130332	0.00614714	-	-	-	0.00433809
C8H12 isomer	C8H12	1009.68	1.351	-	0.00128174	-	-	-	-
C8H12 isomer	C8H12	1024.68	1.36	0.00128989	0.00285001	-	-	-	-
C8H12 isomer	C8H12	1034.68	1.355	0.00563837	0.00287692	-	-	-	0.00425229
C8H12 isomer	C8H12	1059.67	1.404	0.00248041	0.0100908	-	-	-	-
C8H12 isomer	C8H12	1079.66	1.395	-	0.00418212	-	-	-	-
C8H12 isomer	C8H12	1089.66	1.377	0.0032721	0.00312496	-	-	-	0.00392662
C8H12 isomer	C8H12	1109.65	1.412	0.00163466	-	-	-	-	-
C8H12 isomer	C8H12	1139.64	1.399	-	0.00241441	-	-	-	0.00387136
C8H12 isomer	C8H12	1144.64	1.452	-	0.00254023	-	-	-	-
C9H14 isomer	C9H14	939.706	1.192	0.000963062	0.00154625	-	-	-	0.00972142
C9H14 isomer	C9H14	954.701	1.188	-	-	-	-	-	0.00662199
C9H14 isomer	C9H14	1029.68	1.258	-	-	-	-	-	0.00318275
C9H14 isomer	C9H14	1069.66	1.113	-	-	-	-	-	0.0096261
C9H14 isomer	C9H14	1089.66	1.228	0.000926294	0.000665925	-	-	0.000278005	-
C9H14 isomer	C9H14	1099.65	1.254	-	0.000805614	-	-	-	-
C9H14 isomer	C9H14	1124.65	1.245	0.010225	0.00315538	-	-	-	-
C9H14 isomer	C9H14	1154.64	1.236	-	0.00195121	-	-	-	-
C9H14 isomer	C9H14	1194.62	1.302	-	0.00126261	-	-	-	-
C9H14 isomer	C9H14	1214.62	1.298	-	0.00234912	-	-	-	-
C9H14 isomer	C9H14	1229.61	1.32	-	0.000666715	-	-	-	-
C9H14 isomer	C9H14	1259.6	1.355	-	0.00229355	-	-	-	-
C11H18 isomer	C11H18	1794.43	1.342	0.0028866	0.00394466	-	-	-	-
Other
1,5-Hexadien-3-yne	C6H6	404.877	1.659	0.00781833	0.00891028	0.000512273	0.00054814	0.00231835	0.00316863
1,5-Hexadiyne	C6H6	439.866	1.69	0.00049461	0.000858524	-	-	-	-
C7H8 isomer	C7H8	679.789	1.632	0.00351809	0.00262919	-	-	0.000865116	0.00213361
C7H8 isomer	C7H8	714.778	1.672	0.0044154	0.00197252	-	-	0.000510111	-
C7H8 isomer	C7H8	859.731	1.936	-	0.00109263	-	-	-	-
1,3,5-cycloheptatriene	C7H8	864.73	1.918	0.00107897	-	0.000231183	-	0.00075093	-
C8H8 isomer	C8H8	1219.62	1.888	0.00187079	0.00162976	0.000390079	-	0.000229043	-
C8H10 isomer	C8H10	1039.67	1.641	0.00226734		-	-	-	-
C8H10 isomer	C8H10	1044.67	1.602	-	0.00170661	-	-	-	-
C8H10 isomer	C8H10	1074.66	1.65	0.00122844	0.00191574	-	-	-	-
C8H10 isomer	C8H10	1144.64	1.786	-	0.0017535	-	-	-	-
C8H10 isomer	C8H10	1154.64	1.76	-	-	-	-	0.000556241	-
C9H12 isomer	C9H12	1014.68	1.267	0.00244582	-	-	-	-	-
C10H14 isomer	C10H14	1169.63	1.267	0.00506252	-	-	-	-	-
C10H14 isomer	C10H14	1304.59	1.28	0.00126428	-	-	-	-	-
C10H14 isomer	C10H14	1334.58	1.412	0.00188574	0.00442685	-	-	-	-
C10H14 isomer	C10H14	1409.56	1.434	0.00206107	0.0065658	-	-	-	-
C10H14 isomer	C10H14	1464.54	1.487	-	0.00729626	-	-	-	-
C11H16 isomer	C11H16	1629.48	1.465	-	0.00163348	-	-	-	-
Biogenic
Other
Isoprene	C5H8	189.946	0.994	0.275315	0.404247	0.0297639	0.0115551	0.0881339	0.313879
Santene	C9H14	1069.66	1.157	0.123357	-	-	-	-	-
Bornyl Acetate	C12H20O2	2094.34	1.628	0.0399741	-	-	-	-	-
Monoterpenes
C10H16 isomer	C10H16	1069.66	1.091	-	0.00115579	-	-	-	-
Bornylene	C10H16	1129.64	1.144	0.00865305	-	-	-	-	-
C10H16 isomer	C10H16	1159.64	1.228	-	0.00218043	-	-	-	-
gamma pyronene	C10H16	1174.63	1.197	0.0169866	0.00881804	-	-	0.000499135	-
Tricyclene	C10H16	1189.63	1.153	0.200843	-	-	-	-	-
a-thujene	C10H16	1194.62	1.157	-	0.00890582	-	-	-	-
à-Pinene	C10H16	1219.62	1.157	0.172635	0.0824517	-	-	0.000857538	-
C10H16 isomer	C10H16	1244.61	1.192	0.00634018	0.00311774	-	-	-	-
à-Fenchene	C10H16	1254.6	1.201	0.00500052	0.00877422	-	-	-	-
Camphene	C10H16	1264.6	1.228	0.44235	0.0170204	-	-	-	-
C10H16 isomer	C10H16	1279.6	1.232	0.0180944	0.0113732	-	-	-	-
C10H16 isomer	C10H16	1284.6	1.232	0.00150513	-	-	-	-	-
C10H16 isomer	C10H16	1289.59	1.245	0.00985973	0.0166197	-	-	0.00208889	-
C10H16 isomer	C10H16	1299.59	1.236	0.00150077	0.00536703	-	-	-	-
C10H16 isomer	C10H16	1309.59	1.223	0.00373765	0.00154735	-	-	-	-
C10H16 isomer	C10H16	1319.58	1.245	-	0.00163084	-	-	-	-
Sabinene	C10H16	1329.58	1.267	0.0222615	0.00520058	-	-	-	-
b-Pinene	C10H16	1339.58	1.254	0.0892	0.230589	-	-	-	-
b-pyronene	C10H16	1354.57	1.28	0.0182687	-	-	-	-	-
b-Myrcene	C10H16	1364.57	1.28	0.125509	0.215231	-	-	-	0.00678676
pyronene?	C10H16	1384.56	1.276	-	0.00266686	-	-	-	-
C10H16 isomer	C10H16	1394.56	1.245	0.00395851	0.0048983	-	-	-	-
à-Phellandrene	C10H16	1414.55	1.302	0.0126345	0.0164809	-	-	-	-
3-Carene	C10H16	1424.55	1.267	0.13856	0.176106	-	-	-	-
Alpha terpinene	C10H16	1444.54	1.311	0.0164434	0.0108521	-	-	-	-
C10H16 isomer	C10H16	1459.54	1.307	0.00176521	-	-	-	-	-
C10H16 isomer	C10H16	1464.54	1.316	0.00231153	0.00337774	-	-	-	-
Limonene	C10H16	1474.53	1.329	0.225406	0.170949	0.00134498	0.00195395	0.0175466	-
Z-Ocimene	C10H16	1479.53	1.338	-	0.0382851	-	-	-	-
b-Phellandrene	C10H16	1484.53	1.36	0.0468425	0.0244632	-	-	0.000884576	-
C10H16 isomer	C10H16	1499.53	1.32	0.00268989	0.00512663	-	-	-	-
(E)-Ocimene	C10H16	1514.52	1.355	0.00436371	0.00544437	-	-	-	-
Gamma terpinene	C10H16	1544.51	1.364	0.00602568	0.00770673	-	-	-	-
C10H16 isomer	C10H16	1589.5	1.382	0.00271872	0.00608957	-	-	-	-
Terpinolene	C10H16	1619.49	1.39	0.0382919	0.0351494	-	-	-	-
Allo-ocimene or a-pyronene	C10H16	1729.45	1.443	0.0047261	0.00638206	-	-	-	-
1,3-Cyclohexadiene, 5-butyl-	C10H16	1754.44	1.333	0.0012568	-	-	-	-	-
Allo-ocimene or a-pyronene	C10H16	1764.44	1.474	0.00180636	0.00240131	-	-	-	-
Sesquiterpenes (and related)
à-Calacorene	C15H20	2624.17	1.822	-	-	-	-	-	0.0129277
Calamenene	C15H22	2579.18	1.654	0.00679416	-	-	-	-	0.0180386
à-Cubebene	C15H24	2229.29	1.241	0.00508237	-	-	-	-	-
Copaene	C15H24	2294.27	1.28	0.00485543	0.00488986	-	-	-	-
C15H24 isomer	C15H24	2319.26	1.39	0.00839728	-	-	-	-	-
Germacrene D	C15H24	2379.24	1.36	0.00605206	0.0118472	-	-	-	-
B-Caryophyllene	C15H24	2394.24	1.404	0.00727175	-	-	-	-	-
C15H24 isomer	C15H24	2404.24	1.373	0.00558568	0.0102132	-	-	-	-
C15H24 isomer	C15H24	2454.22	1.47	-	0.00733449	-	-	-	-
Cadinene isomer	C15H24	2484.21	1.448	0.00962312	0.00748307	-	-	-	-
Cadinene isomer	C15H24	2529.2	1.456	0.00991713	0.0055151	-	-	-	-
Cadinene isomer	C15H24	2564.19	1.492	0.028189	0.00836463	-	-	-	-
Cadinene isomer	C15H24	2604.17	1.536	0.00500426	-	-	-	-	-
Ledane	C15H26	2414.23	1.355	-	-	-	-	-	0.0187049
C15H26 Isomer	C15H26	2504.2	1.373	-	-	-	-	-	0.0173378
Patchulane	C15H26	2549.19	1.448	-	-	-	-	-	0.0232646
Oxygenated hydrocarbons
Aldehydes
Acrolein	C3H4O	169.952	1.426	0.215276	0.26315	0.0345829	0.0265799	0.0616245	0.0574894
Propanal	C3H6O	174.95	1.241	0.00952003	0.0102813	0.00675752	-	0.0129442	0.0387452
Methacrolein	C4H6O	259.923	1.571	0.072602	0.101974	0.00838945	0.00772359	0.0226932	0.0610864
2-Butenal	C4H6O	419.872	2.517	0.0793916	0.145822	0.00837969	0.0219014	0.0424792	0.0167963
Propanal, 2-methyl-	C4H8O	239.93	1.298	0.0196569	0.0427045	0.00118577	-	0.0130037	0.147547
Acetaldehyde, methoxy-	C3H6O2	279.917	2.592	-	0.00249695	-	-	-	-
Butanal	C4H8O	289.914	1.558	0.0149983	0.0306391	-	0.00361008	0.016001	0.00672545
Pent-2-ynal	C5H6O	484.851	2.512	0.00128584	0.00178166	-	-	-	-
2-Ethylacrolein	C5H8O	464.858	1.756	0.00365697	0.00441631	-	-	0.00260446	-
4-Pentenal	C5H8O	499.846	2.182	0.00167917	0.00342657	-	-	0.00080657	-
2-Butenal, 2-methyl-	C5H8O	669.792	2.174	0.00386868	0.0084552	-	-	0.00248109	0.00632319
2-Pentenal, (E)-	C5H8O	704.781	2.345	-	0.00286148	-	-	0.000876735	-
2-Butenal, 3-methyl-	C5H8O	794.752	2.658	0.00181368	0.00364884	-	-	0.000433564	-
Butanal, 3-methyl-	C5H10O	429.869	1.558	0.0171113	0.0462205	0.000830614	0.00247079	0.00809429	0.112723
Butanal, 2-methyl-	C5H10O	449.862	1.514	0.00538616	0.0222438	0.000567688	0.00121879	0.00497179	0.0707528
Pentanal	C5H10O	529.837	1.707	0.0155496	0.0198999	-	0.0011074	-	0.0137268
Hexanal	C6H12O	829.741	1.694	0.00991477	0.01089	-	-	0.00154088	0.0106107
Heptanal	C7H14O	1124.65	1.663	0.0069896	0.0086612	-	-	-	0.0174088
Octanal	C8H16O	1399.56	1.632	0.00261452	-	-	-	-	-
Nonanal	C9H18O	1659.48	1.606	0.00385424	-	-	0.00288768	-	-
Decanal	C10H20O	1899.4	1.584	-	-	0.00158648	-	-	-
Dodecanal	C12H24O	2329.26	1.566	-	-	0.00203016	-	-	0.00477705
Ketones
Acetone	C3H6O	174.95	1.32	0.133379	0.251037	0.0351816	0.0357887	0.107894	0.37042
Hydroxyacetone	C3H6O2	444.864	3.846	0.00902839	0.0521454	0.010367	0.00974545	0.110161	-
Methyl vinyl ketone	C4H6O	289.914	2.015	0.188443	0.285232	0.0276242	0.0376772	0.126509	0.0934224
2,3-Butanedione	C4H6O2	289.914	2.253	0.0979147	0.178973	0.00764573	0.0494617	0.055928	0.0433935
2-Butanone	C4H8O	299.91	1.685	0.03766	0.123242	0.00489121	0.0159496	0.0675573	0.100144
2-Butanone, 3-hydroxy-	C4H8O2	564.826	1.065	-	-	-	-	0.00499559	-
1-Hydroxy-2-butanone	C4H8O2	724.774	1.514	-	-	-	-	0.0065424	-
3-Cyclopentene-1,2-dione	C5H4O2	1054.67	0.04	-	-	-	-	0.00428628	-
2-Cyclopentene-1,4-dione	C5H4O2	1089.66	2.389	0.012306	0.0118134	-	0.00415351	0.00565521	-
1,4-Pentadien-3-one	C5H6O	499.846	2.592	-	0.000754176	-	-	0.000513591	-
3-Cyclopenten-1-one	C5H6O	694.784	3.37	0.00886711	0.0145918	-	0.00269856	0.00393993	-
2-Cyclopenten-1-one	C5H6O	929.709	4.022	0.0196602	0.0633733	0.00700242	0.0158708	0.0620274	0.0290905
3-Buten-2-one, 3-methyl-	C5H8O	479.853	1.888	0.0291446	0.0700635	0.00208701	0.0106012	0.0233335	0.0349141
4-Penten-2-one	C5H8O	489.85	2.244	0.00216388	0.00406936	0.000233447	0.00049197	0.00247274	0.00211589
1-Penten-3-one	C5H8O	509.843	2.011	0.00253289	0.00337679	0.00061368	0.00121764	0.00835149	0.00266404
3-Penten-2-one (Z)	C5H8O	514.842	1.954	0.0020162	0.00425773	0.00023852	0.000571844	0.00388822	-
C5H8O isomer	C5H8O	609.811	2.244	-	-	-	-	0.00110638	-
3-Penten-2-one, (E)-	C5H8O	669.792	2.416	0.000774488	0.010065	0.000587182	0.00160418	0.0135482	0.00498549
Cyclopentanone	C5H8O	799.75	2.583	0.0108715	0.0337028	0.00130293	0.00755153	0.025107	0.0296194
2,3-Pentanedione	C5H8O2	534.835	2.178	0.00970537	0.025685	0.000600497	0.00693786	0.015448	0.00406034
2-Butanone, 3-methyl-	C5H10O	444.864	1.597	0.00062734	0.0114405	0.000539285	0.00273063	0.0070832	0.0498073
2-Pentanone	C5H10O	509.843	1.734	0.00446275	0.0194626	-	0.0022946	0.0168599	0.016447
3-Pentanone	C5H10O	534.835	1.698	-	-	-	-	0.00627692	-
2,4-Hexadienal, (E,E)-	C6H8O	1034.68	3.045	-	-	-	-	0.0041778	-
2-Cyclopenten-1-one, 2-methyl-	C6H8O	1139.64	2.966	0.00598062	0.0186934	0.00254045	0.00518292	0.0257361	0.021759
2-Cyclohexen-1-one	C6H8O	1219.62	3.348	-	-	-	-	0.00237728	-
2-Cyclopenten-1-one, 3-methyl-	C6H8O	1314.59	3.762	-	-	-	-	0.00482423	-
2-Pentanone, 3-methylene-	C6H10O	734.771	1.817	-	-	-	-	0.000892662	-
1-Penten-3-one, 2-methyl-	C6H10O	749.766	1.773	-	-	-	-	0.00169554	-
5-Hexen-3-one	C6H10O	759.763	2.046	-	-	-	-	0.000457897	-
5-Hexen-2-one	C6H10O	759.763	2.138	-	0.00177229	-	-	0.000915386	-
1-Hexen-3-one	C6H10O	764.762	1.91	-	-	-	-	0.000576563	-
4-Hexen-2-one	C6H10O	789.754	1.83	-	-	-	-	0.00063676	-
4-Penten-2-one, 3-methyl-	C6H10O	834.739	2.134	-	0.00146623	-	-	0.000788917	-
3-Penten-2-one, 4-methyl-	C6H10O	839.738	1.984	-	-	-	-	0.000557258	-
4-Hexen-3-one isomer	C6H10O	859.731	2.187	-	-	-	-	0.000527818	-
4-Hexen-3-one isomer	C6H10O	939.706	2.121	-	-	-	-	0.00221295	-
Cyclopentanone, 2-methyl-	C6H10O	949.702	2.156	-	0.00811742	-	-	0.00792778	-
3-Penten-2-one, 3-methyl-	C6H10O	954.701	2.134	-	0.00115763	-	-	-	-
3-hexen-2-one	C6H10O	964.698	2.187	-	-	-	-	0.000996873	-
3-Methylcyclopentanone	C6H10O	974.694	2.248	-	-	-	-	0.00326448	-
Cyclohexanone	C6H10O	1109.65	2.473	-	0.00685414	-	0.00156565	0.00166218	0.0149389
C6 Diketone isomer	C6H10O2	664.794	1.738	-	-	-	-	-	0.00814431
C6 Diketone isomer	C6H10O2	789.754	1.976	0.0010678	0.00231516	0.000294723	0.0010642	0.001932	-
C6 Diketone isomer	C6H10O2	829.741	1.932	-	-	-	-	0.000619886	-
C6 Diketone isomer	C6H10O2	874.726	1.852	0.0125113	-	-	-	0.00323537	0.00413742
Methyl Isobutyl Ketone	C6H12O	664.794	1.61	-	0.00430506	-	-	0.000950283	0.0109924
3-Pentanone, 2-methyl-	C6H12O	689.786	1.536	-	-	-	-	0.000267962	0.00639994
2-Pentanone, 3-methyl-	C6H12O	699.782	1.61	-	-	-	-	0.000946265	0.0202345
3-Hexanone	C6H12O	784.755	1.628	-	-	-	-	0.00195436	-
2-Hexanone	C6H12O	804.749	1.729	0.00260078	0.00567695	-	-	0.00260619	0.0106859
Cyclopentanone, 3,4-bis(methylene)-	C7H8O	1289.59	2.873	-	-	-	-	0.000850435	-
2-Cyclopenten-1-one, 3,4-dimethyl-	C7H10O	1229.61	2.358	-	0.00405972	-	-	0.00453467	-
3-methyl-3-cyclohexen-1-one	C7H10O	1254.6	2.407	-	-	-	-	0.00181668	-
2-Cyclopenten-1-one, 2,3-dimethyl-	C7H10O	1389.56	2.618	-	-	-	-	0.00325093	-
C7H10O isomer	C7H10O	1514.52	2.917	-	-	-	-	0.00164744	-
Cyclopentanone, 2-ethyl-	C7H12O	1234.61	2.033	-	-	-	-	0.000943102	-
3-pentanone, 2,4-dimethyl	C7H14O	664.794	1.747	0.00534206	-	0.00337274	-	0.0015441	0.00795654
2-Heptanone	C7H14O	1094.66	1.694	-	0.00239877	-	-	0.000966914	0.00862173
Esters
Acetic acid, methyl ester	C3H6O2	209.939	1.342	0.0238044	0.0472828	0.00635091	0.0285242	0.0388121	0.0802147
Acetic acid ethenyl ester	C4H6O2	279.917	1.619	0.00613734	0.00338759	-	-	-	-
Ethyl Acetate	C4H8O2	339.898	1.527	-	-	-	-	0.000531648	-
2-Propenoic acid, methyl ester	C4H6O2	344.896	1.817	0.00611455	0.00942661	-	0.00157242	0.00245735	0.00720838
Butyrolactone	C4H6O2	1159.64	2.68	-	0.00734046	0.000698046	-	0.0151588	-
Acetic anhydride	C4H6O3	789.754	3.353	0.0120332	0.0176832	-	0.00267353	0.0073942	-
Methyl propionate	C4H8O2	369.888	1.571	0.00229699	0.00581396	-	0.0028673	0.00434784	0.00923254
2(3H)-Furanone, 5-methyl-	C5H6O2	1044.67	4.343	-	0.00306396	-	0.000758495	-	-
Acetic acid, 2-propenyl ester	C5H8O2	544.832	1.94	0.00355565	0.00377046	-	-	0.00112962	-
Methacrylic acid methyl ester	C5H8O2	579.821	1.716	0.00229142	0.00623917	-	-	-	-
2-Butenoic acid, methyl ester	C5H8O2	739.77	2.02	-	-	-	-	0.000761663	-
Butanoic acid, methyl ester	C5H10O2	604.813	1.584	-	0.00278204	-	0.00143001	0.00151563	-
2-Vinylethyl acetate	C6H10O2	814.746	1.839	0.00180691	-	-	-	-	-
Acetic acid, butyl ester	C6H12O2	869.728	1.549	-	0.00339171	-	-	-	-
Isobutyric acid, allyl ester	C7H12O2	979.693	4.25	-	-	0.000907405	-	-	-
Alcohols
Isopropyl Alcohol	C3H8O	174.95	1.795	0.00256604	-	0.00481999	-	0.00754798	-
2-Propen-1-ol	C3H6O	219.936	4.255	0.0160737	0.0231578	0.00101154	0.00269457	0.00650695	-
1-Butanol	C4H10O	429.869	3.731	0.00699935	0.0299547	0.00533339	0.0177725	0.00575618	-
Other
2H-Pyran, 3,4-dihydro-	C5H8O	514.842	1.54	0.00156092	0.00301104	-	0.000679514	-	-
Furans
Furan	C4H4O	179.949	1.236	0.233527	0.31152	0.0223098	0.0647158	0.0854338	0.31157
Furan, 2,5-dihydro-	C4H6O	259.923	1.91	0.00243244	0.0030805	-	-	0.000532002	-
2,3-Dihydrofuran	C4H6O	264.922	1.39	0.00985763	0.0208251	-	0.0108902	0.00592106	0.00610075
Furan, tetrahydro-	C4H8O	364.89	1.412	0.00175141	0.00323042	0.000535441	0.000576486	0.00141311	-
Furan, 2-methyl-	C5H6O	319.904	1.487	0.134807	0.207442	0.00861576	0.044968	0.066183	0.234522
Furan, 3-methyl-	C5H6O	334.899	1.575	0.0134072	0.0220795	0.00118846	0.00504002	0.00764479	0.0249438
Furan, 2,3-dihydro-5-methyl-	C5H8O	459.859	1.456	0.00218009	0.00620983	-	0.00279025	0.00122325	-
Vinylfuran	C6H6O	619.808	2.09	0.00685344	0.00953488	0.000872061	0.00111295	0.00508379	-
Furan, 2-ethyl-	C6H8O	544.832	1.531	0.00689236	0.0121114	0.00104098	0.00108017	0.0067653	0.0119488
Furan, 2,5-dimethyl-	C6H8O	569.824	1.5	0.0378701	0.07916	0.000866451	0.00881079	0.0270483	0.0663914
Furan, 3-ethyl-	C6H8O	579.821	1.637	0.00154905	0.00210672	-	0.00060631	0.000530615	-
Furan, 2,4-dimethyl-	C6H8O	594.816	1.54	0.00615681	0.0130599	0.000666469	0.00196103	0.00373454	0.0342166
Furan, 2,3-dimethyl-	C6H8O	599.814	1.553	0.00345535	-	-	-	0.00181026	-
Furan, 2-(1-propenyl)-	C7H8O	939.706	1.98	-	-	-	-	0.000641746	-
Furan, 2-(2-propenyl)-	C7H8O	1009.68	2.002	-	0.00289538	-	0.000685586	0.000903982	-
Furan, 2-propyl-	C7H10O	799.75	1.505	0.000976766	0.00196866	-	-	0.000374321	-
Furan, 2-ethyl-5-methyl-	C7H10O	829.741	1.452	0.0054242	0.0102745	-	9.44506e-05	0.00599616	0.0143923
Furan, 2,3,5-trimethyl-	C7H10O	889.722	1.474	0.00299735	0.00251245	-	0.000986405	0.00133652	0.00739297
2-Propionylfuran	C7H8O2	1429.55	3.555	-	-	-	-	0.00154608	-
Furan, 4-methyl-2-propyl-	C8H12O	1074.66	1.408	0.000977931	-	-	-	-	-
Aldehydes & Ketones
3-Furaldehyde	C5H4O2	869.728	1.012	0.0166893	0.0289462	0.00248088	0.00846775	0.00948045	-
Furfural	C5H4O2	934.707	1.131	0.213985	0.437734	0.0213411	0.1624	0.19527	0.347181
Furan, 2-acetyl-	C6H6O2	1164.63	4.484	0.00659775	0.0176561	0.00207659	0.00604835	0.0176269	-
5-methyl furfural	C6H6O2	1309.59	4.396	0.0130419	0.0336253	-	0.00720394	0.0422703	0.0511627
Methyl 2-furoate	C6H6O3	1344.58	4.088	-	-	-	-	0.00159053	-
2-Acetyl-5-methylfuran	C7H8O2	1509.52	3.542	-	-	-	-	0.00193534	-
Alcohols
2-furan methanol	C5H6O2	984.691	3.309	0.0434188	0.131656	0.0100314	0.071186	0.1204	-
N- & S-containing
Nitriles
Acetonitrile	C2H3N	169.952	2.592	0.0178391	0.0311962	0.0211975	-	0.0207442	0.0636385
Acrylonitrile	C3H3N	199.942	2.433	0.0175093	0.030675	0.0204931	0.00164677	0.00945975	0.0183711
Propanenitrile	C3H5N	269.92	2.873	0.00980584	0.0178989	0.00589956	0.00129137	0.00907095	0.023893
Methacrylonitrile	C4H5N	309.907	2.306	0.00752211	0.0112383	0.00408454	-	0.00510447	0.0129611
3-Butenenitrile	C4H5N	409.875	3.221	0.00415184	0.0079511	0.00295558	-	0.00361537	-
2-Butenenitrile	C4H5N	494.848	3.705	-	0.00563685	0.00218228	-	0.0026056	-
Isobutyronitrile	C4H7N	359.891	2.332	0.00582753	0.00928237	0.00236886	-	0.00398659	0.0182324
Butanenitrile	C4H7N	464.858	2.988	0.00370946	0.00522136	0.00141043	-	0.00269568	0.0129778
2,4-Pentadienenitrile	C5H5N	684.787	4.176	-	-	0.00109956	-	-	-
Butanenitrile, 2-methylene-	C5H7N	614.81	2.319	-	-	-	-	0.00127114	-
3-Butenenitrile, 3-methyl-	C5H7N	759.763	3.106	-	-	-	-	0.00137022	-
Butanenitrile, 2-methyl-	C5H9N	609.811	2.288	0.00435719	0.00599804	0.00131176		0.00195082	0.0157803
Butanenitrile, 3-methyl-	C5H9N	624.806	2.583	0.00588802	0.0109249	0.00222519	-	0.00475331	0.0188193
Pentanenitrile	C5H9N	754.765	2.794	-	-	-	-	0.00100226	-
Pentanenitrile, 4-methyl-	C6H11N	954.701	2.486	0.00381701	0.00572956	0.00146752	-	0.0027178	-
Benzonitrile	C7H5N	1369.57	4.541	0.0166882	0.0255447	0.0369521	0.00452686	0.0126558	0.0636424
Benzonitrile, 3-methyl-	C8H7N	1599.49	3.577	-	-	0.00251856	-	-	-
Pyrroles
Pyrrole	C4H5N	694.784	4.602	0.0416784	0.110395	0.0227911	0.0135289	0.0497613	0.0551003
1H-Pyrrole, 1-methyl-	C5H7N	664.794	2.574	0.0106688	0.0211092	0.00234655	0.00409944	0.00574074	0.0312572
1H-Pyrrole, 2-methyl-	C5H7N	934.707	4.167	0.00494389	0.0154567	0.00227326	-	0.00679378	0.0180363
1H-Pyrrole, 3-methyl-	C5H7N	959.699	4.294	-	0.0053605	-	-	0.00383395	-
1H-Pyrrole, 1-ethyl-	C6H9N	874.726	2.235	-	0.00623236	-	-	0.00162552	-
1H-Pyrrole, 2,4-dimethyl-	C6H9N	949.702	2.218	-	-	-	-	0.00138012	-
1H-Pyrrole, 2,5-dimethyl-	C6H9N	1044.67	2.398	-	0.00593666	-	-	0.00119636	0.0137833
1H-Pyrrole, 2-ethyl-	C6H9N	1174.63	1.822	-	-	-	-	0.00113156	-
Pyridines
Pyridine	C5H5N	674.79	2.992	0.0143154	0.0302706	0.0221991	0.00421789	0.0190559	0.118128
Pyridine, 2-methyl-	C6H7N	889.722	2.442	-	0.00581631	0.00200928	-	0.00609036	0.0202171
Pyridine, 3-methyl-	C6H7N	1024.68	2.684	-	-	-	-	0.00244114	-
Thiophenes
Thiophene	C4H4S	464.858	2.174	0.00358985	0.00464238	0.00685872	-	0.00261271	0.0101308
Thiophene, 2-methyl-	C5H6S	754.765	1.954	-	0.00192977	-	-	0.000794753	0.00667983
Thiophene, 3-methyl-	C5H6S	779.757	2.064	-	-	-	-	0.00060586	-
Benzo[a]thiophene	C8H6S	1914.39	3.428	-	-	0.003562	-	-	-
Other
Pyrazine	C4H4N2	629.805	3.665	-	-	-	-	0.002897	-
Pyrazine, methyl-	C5H6N2	904.717	2.86	-	-	-	-	0.00342471	-
3-Methylpyridazine	C5H6N2	1074.66	3.863	0.00709482	0.0131932	-	-	0.00591536	-
Total Emission Factor				8.23739	11.4909	1.42502	1.07488	3.37889	14.6173
