# Supplementary material for: Identification and quantification of gaseous organic compounds emitted from biomass burning using two-dimensional gas chromatography–time-of-flight mass spectrometry
Source: Copernicus journal article supplement (doi:10.5194/acp-15-1865-2015), 2015-02-23
Supplement: Supplementary file 2 [file acp-15-1865-2015-supplement-cover-letter.pdf › acp-15-1865-2015-supplement-cover-letter.pdf]

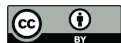

## *Supplement of*

# **Identification and quantification of gaseous organic compounds emitted from biomass burning using two-dimensional gas chromatography–time-of-flight mass spectrometry**

**L. E. Hatch et al.**

*Correspondence to:* K. C. Barsanti ([barsanti@pdx.edu](mailto:barsanti@pdx.edu))

- [acp-15-1865-2015-supplement-cover-letter.pdf](#)
- Supplementary Files
  - .DS\_Store
  - Supplementary Figures S1 and S2.pdf
  - Table\_S1.xlsx
